# Supplementary material for: Co-catalysis of trace dissolved Fe(iii) with biochar in hydrogen peroxide activation for enhanced oxidation of pollutants
Source: Royal Society of Chemistry journal article supplement (doi:10.1039/d2ra01647h), 2022-01-01
Supplement: d2ra01647h1.pdf [file d2ra01647h1.pdf]

*Supplementary Information*

**Co-catalysis of trace dissolved Fe(III) with biochar in hydrogen peroxide  
activation for enhanced oxidation of pollutants**

Dongqing Feng <sup>a</sup>, Jianxin Shou <sup>b,\*</sup>, Sen Guo <sup>a</sup>, Mengna Ya <sup>a</sup>, Jianfa Li <sup>a,\*</sup>, Huaping Dong <sup>a</sup>,  
Yimin Li <sup>a</sup>

<sup>a</sup> College of Chemistry and Chemical Engineering, Shaoxing University, Shaoxing  
Zhejiang, 312000, China

<sup>b</sup> College of Life Science, Shaoxing University, Shaoxing Zhejiang, 312000, China

\*Corresponding authors

Email: jianxinshou@usx.edu.cn (Jianxin Shou); ljf@usx.edu.cn (Jianfa Li)

Tel.: +86 575 8834 1524; Fax: +86 575 8834 1521

Address: 508 Huancheng West Road, Zhejiang Shaoxing, 312000, China

Number of pages (including this page): 11

**Table S1.** The compositions and properties of two biochar samples

| Sample                                | LB <sup>[1]</sup> | WB          |
|---------------------------------------|-------------------|-------------|
| S <sub>ABET</sub> (m <sup>2</sup> /g) | 6.66              | 409         |
| pH                                    | 9.11 ± 0.03       | 8.03 ± 0.06 |
| Ash (%)                               | 23.4 ± 0.1        | 0.89 ± 0.03 |
| Elemental compositions (%)            |                   |             |
| C                                     | 66.0 ± 0.3        | 93.9 ± 0.4  |
| H                                     | 1.53 ± 0.1        | 1.46 ± 0.1  |
| O                                     | 4.31 ± 0.4        | 3.83 ± 0.2  |
| N                                     | 3.36 ± 0.1        | 0           |

**Table S2.** The experimental conditions corresponding to the results shown in different figures

| Run | Biochar dosage (g/L) | Iron species dosage (mg/L) | H <sub>2</sub> O <sub>2</sub> dosage | pH <sub>0</sub> | Figure                                                                                     |
|-----|----------------------|----------------------------|--------------------------------------|-----------------|--------------------------------------------------------------------------------------------|
| 1   | LB 3.0               | /                          | /                                    | 3.0             | Fig. 1(a)                                                                                  |
| 2   | LB 3.0               | /                          | 5.0                                  | 3.0             | Fig. 1(a) (c) (d);<br>Fig. 2;<br>Fig. 3(a) (b);<br>Fig. 4                                  |
| 3   | /                    | /                          | 5.0                                  | 3.0             | Fig. 1(a) (b) (c)                                                                          |
| 4   | /                    | Fe(III) 0.30               | 5.0                                  | 3.0             | Fig. 1(a) (b) (c) (d);<br>Fig. 2;<br>Fig. 4;<br>Fig. 6(c)<br>Fig. 1(a) (c) (d);<br>Fig. 2; |
| 5   | LB 3.0               | Fe(III) 0.30               | 5.0                                  | 3.0             | Fig. 3(a) (b) (c);<br>Fig. 4;<br>Fig. 6(a) (b) (c) (d)                                     |
| 6   | WB 3.0               | /                          | /                                    | 3.0             | Fig. 1(b)                                                                                  |
| 7   | WB 3.0               | /                          | 5.0                                  | 3.0             | Fig. 1(b) (c) (d);<br>Fig. 2                                                               |
| 8   | WB 3.0               | Fe(III) 0.30               | 5.0                                  | 3.0             | Fig. 1(a) (c) (d);<br>Fig. 2;<br>Fig. 4                                                    |
| 9   | LB 3.0               | Fe(III) 0.10               | 5.0                                  | 3.0             | Fig. 3(a) (b)                                                                              |
| 10  | LB 3.0               | Fe(III) 0.60               | 5.0                                  | 3.0             | Fig. 3(a) (b)                                                                              |
| 11  | LB 3.0               | Fe(III) 1.00               | 5.0                                  | 3.0             | Fig. 3(a) (b)                                                                              |
| 12  | LB 3.0               | Fe(II) 0.30                | 5.0                                  | 3.0             | Fig. 3(c)                                                                                  |

|    |        |                                    |     |     |           |
|----|--------|------------------------------------|-----|-----|-----------|
| 13 | /      | Fe(II) 0.30                        | 5.0 | 3.0 | Fig. 3(c) |
| 14 | WB 1.0 | /                                  | 5.0 | 3.0 | Fig. 3(d) |
| 15 | /      | Fe <sub>2</sub> O <sub>3</sub> 1.0 | 5.0 | 3.0 | Fig. 3(d) |
| 16 | WB 1.0 | Fe <sub>2</sub> O <sub>3</sub> 1.0 | 5.0 | 3.0 | Fig. 3(d) |
| 17 | /      | Fe <sub>3</sub> O <sub>4</sub> 1.0 | 5.0 | 3.0 | Fig. 3(d) |
| 18 | WB 1.0 | Fe <sub>3</sub> O <sub>4</sub> 1.0 | 5.0 | 3.0 | Fig. 3(d) |
| 19 | LB 3.0 | Fe(III) 0.30                       | 5.0 | 2.0 | Fig. 6(a) |
| 20 | LB 3.0 | Fe(III) 0.30                       | 5.0 | 2.5 | Fig. 6(a) |
| 21 | LB 3.0 | Fe(III) 0.30                       | 5.0 | 3.5 | Fig. 6(a) |
| 22 | LB 3.0 | Fe(III) 0.30                       | 5.0 | 4.0 | Fig. 6(a) |
| 23 | LB 3.0 | Fe(III) 0.30                       | /   | 3.0 | Fig. 6(b) |
| 24 | LB 3.0 | Fe(III) 0.30                       | 1.0 | 3.0 | Fig. 6(b) |
| 25 | LB 3.0 | Fe(III) 0.30                       | 3.0 | 3.0 | Fig. 6(b) |
| 26 | LB 3.0 | Fe(III) 0.30                       | 7.0 | 3.0 | Fig. 6(b) |
| 27 | LB 3.0 | Fe(III) 0.30                       | 9.0 | 3.0 | Fig. 6(b) |
| 28 | LB 1.0 | Fe(III) 0.30                       | 5.0 | 3.0 | Fig. 6(c) |
| 29 | LB 2.0 | Fe(III) 0.30                       | 5.0 | 3.0 | Fig. 6(c) |
| 30 | LB 4.0 | Fe(III) 0.30                       | 5.0 | 3.0 | Fig. 6(c) |
| 31 | LB 5.0 | Fe(III) 0.30                       | 5.0 | 3.0 | Fig. 6(c) |

---

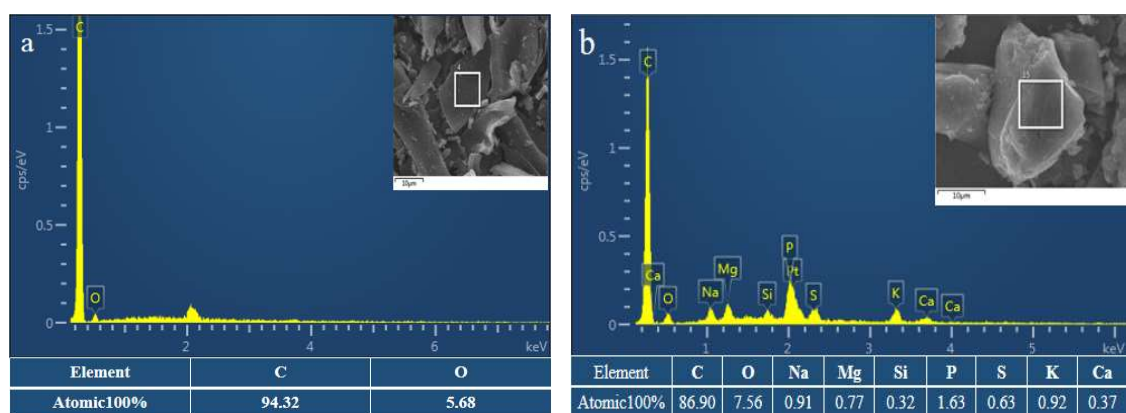

**Fig. S1.** SEM-EDS information of (a) WB and (b) LB samples. The data were obtained in a scanning electron microscope (SEM) (JSM-6360LV, JEOL, Japan) equipped with an energy dispersive X-ray spectrometer (EDS) (X-act, Oxford, UK).

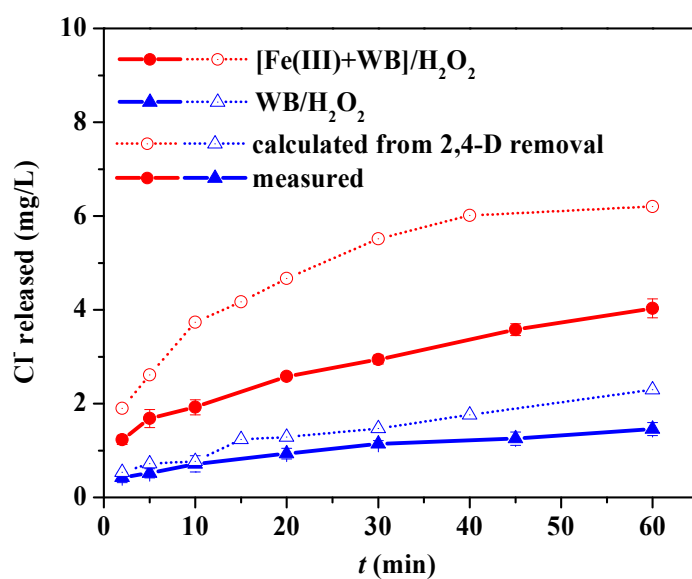

**Fig. S2.** Change of chloride concentration during the oxidation of 2,4-D in [Fe(III)+WB]/H<sub>2</sub>O<sub>2</sub> and WB/H<sub>2</sub>O<sub>2</sub>. The solid lines represent that measured using ionic chromatograph following a method reported previously [2]. The dot lines represent that theoretically calculated from the removal of 2,4-D. Dosage: Fe(III) = 0.30 mg/L, WB = 3.0 g/L, and H<sub>2</sub>O<sub>2</sub> = 5.0 mmol/L; and pH<sub>0</sub> = 3.0.

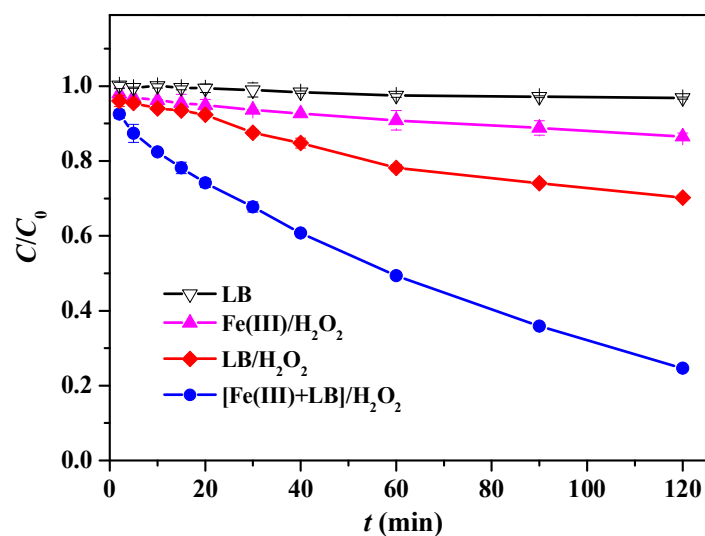

**Fig. S3.** Removal of sulfamethazine (SMZ) ( $C_0 = 20$  mg/L) in the systems using different combination of trace Fe(III) (0.30 mg/L), biochar (LB) (3.0 g/L) and/or  $H_2O_2$  (5.0 mmol/L), and  $pH_0 = 3.0$ .

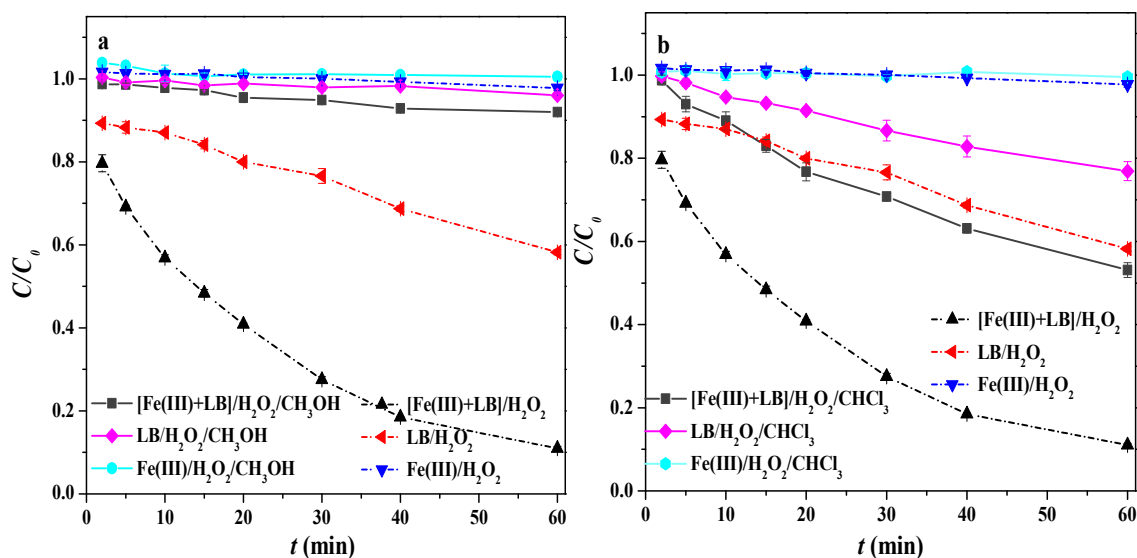

**Fig. S4.** Removal of 2,4-D ( $C_0 = 20$  mg/L) in different oxidation systems with the presence of scavengers: (a) methanol = 50 mmol/L, and (b) chloroform = 50 mmol/L. The solid lines represent the reaction systems with addition of scavengers ( $CH_3OH$  or  $CHCl_3$ ). The dash lines represent the systems without scavenger. Dosage: Fe(III) = 0.30 mg/L, LB = 3.0 g/L, and  $H_2O_2 = 5.0$  mmol/L; and  $pH_0 = 3.0$ .

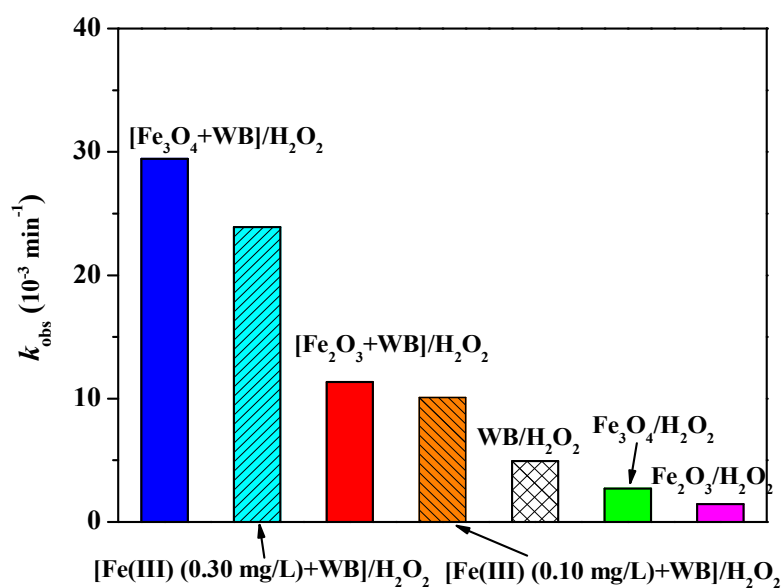

**Fig. S5.** The  $k_{obs}$  values for 2,4-D (20 mg/L) degradation in different oxidation systems. Dosage: WB = 1.0 g/L, H<sub>2</sub>O<sub>2</sub> = 5.0 mmol/L, and iron minerals (Fe<sub>3</sub>O<sub>4</sub> or Fe<sub>2</sub>O<sub>3</sub>) = 1.0 g/L; and pH<sub>0</sub> = 3.0.

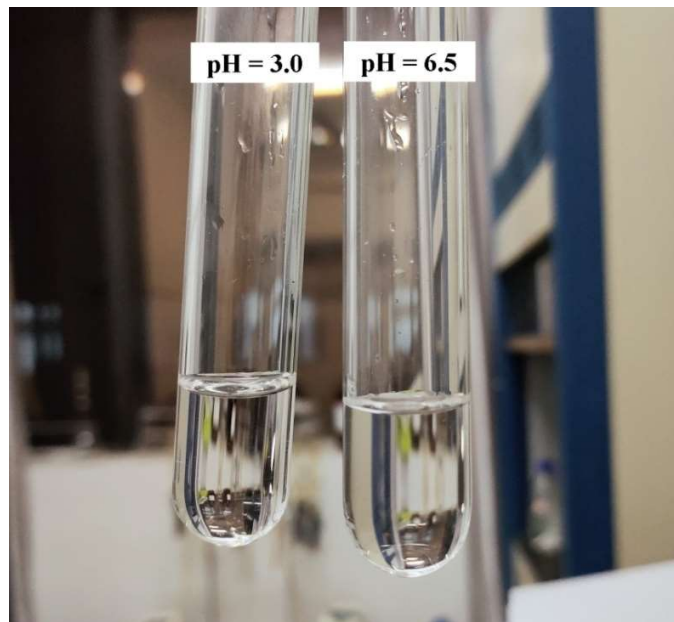

**Fig. S6.** Photos of the clear solution after reaction in [Fe(III)+LB]/H<sub>2</sub>O<sub>2</sub>, left: initial pH of 3.0, and right: pH adjusted to 6.5. Dosage: Fe(III) = 0.30 mg/L, LB = 3.0 g/L, and H<sub>2</sub>O<sub>2</sub> = 5.0 mmol/L; and pH<sub>0</sub> = 3.0.

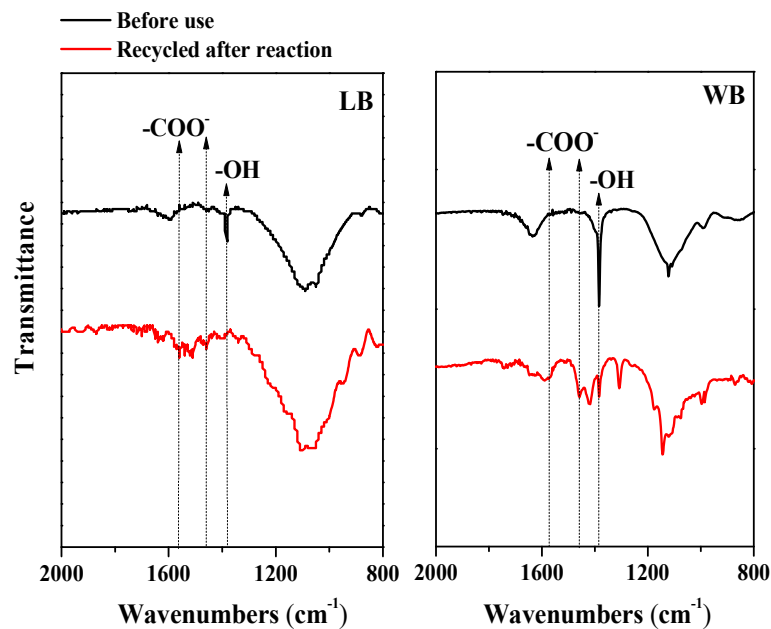

**Fig. S7.** FTIR spectra of the LB and WB samples before use, and recycled after reaction from the co-catalytic systems.

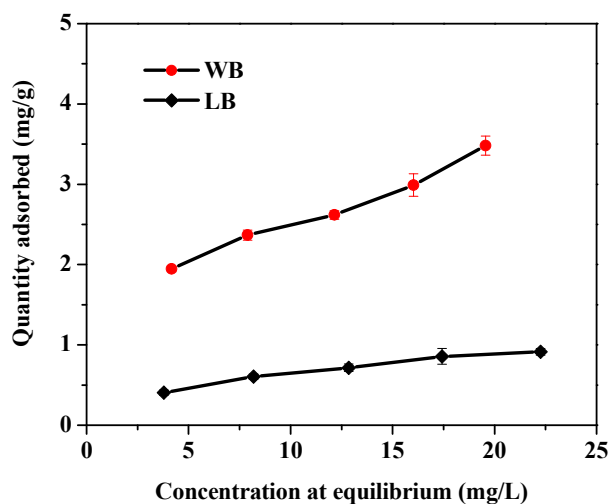

**Fig. S8.** Adsorption isotherms of 2,4-D by LB and WB sample (3.0 g/L), after equilibrium for 24 h at 25 °C and pH 3.0.



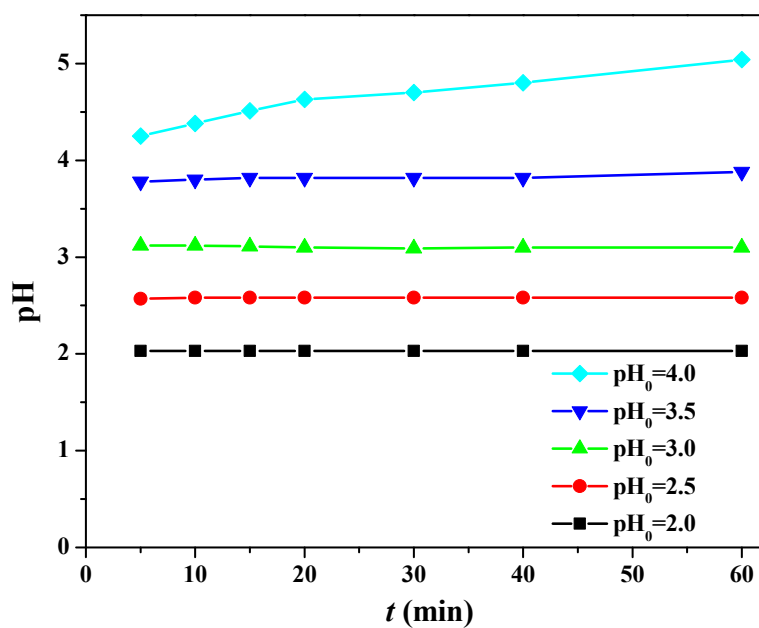

**Fig. S9.** Change of pH during the reaction in [Fe(III)+LB]/H<sub>2</sub>O<sub>2</sub> using various pH<sub>0</sub>. Experimental conditions: C<sub>0</sub> (2,4-D) = 20 mg/L, LB = 3.0 g/L, H<sub>2</sub>O<sub>2</sub> = 5.0 mmol/L, and Fe(III) = 0.30 mg/L.

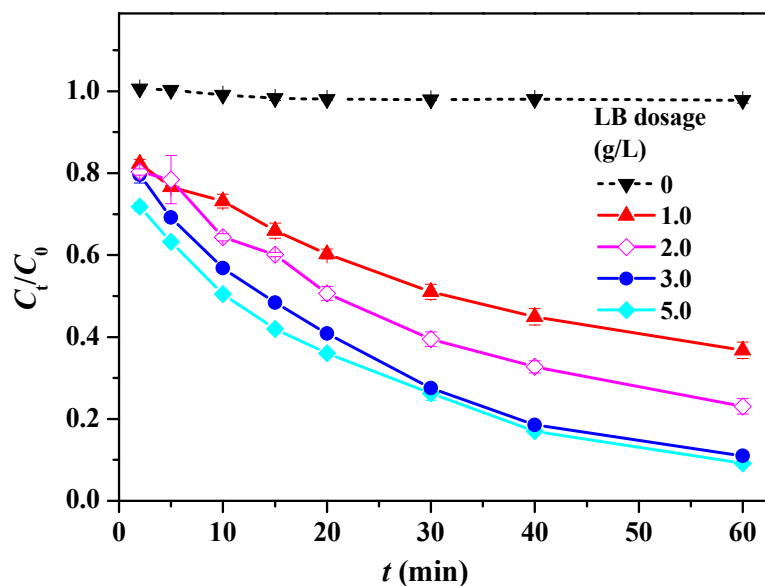

**Fig. S10.** Removal of 2,4-D (C<sub>0</sub> = 20 mg/L) by [Fe(III)+LB]/H<sub>2</sub>O<sub>2</sub> with various LB dosage. Experimental conditions: Fe(III) = 0.30 mg/L, and H<sub>2</sub>O<sub>2</sub> = 5.0 mmol/L; and pH<sub>0</sub> = 3.0.

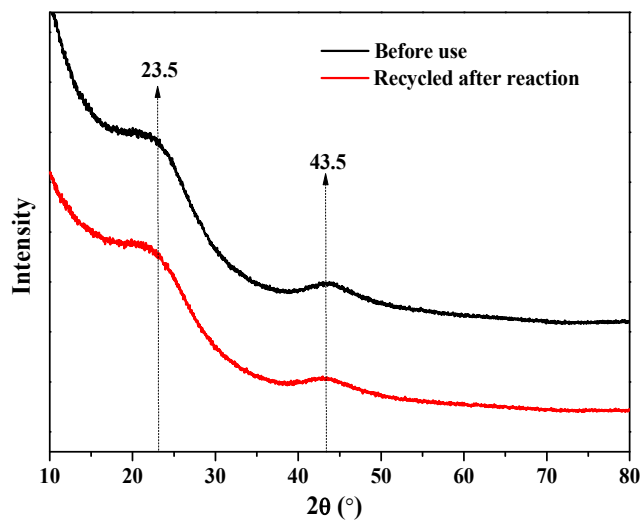

**Fig. S11.** XRD patterns of WB sample before use and recycled after reaction from the co-catalytic system.

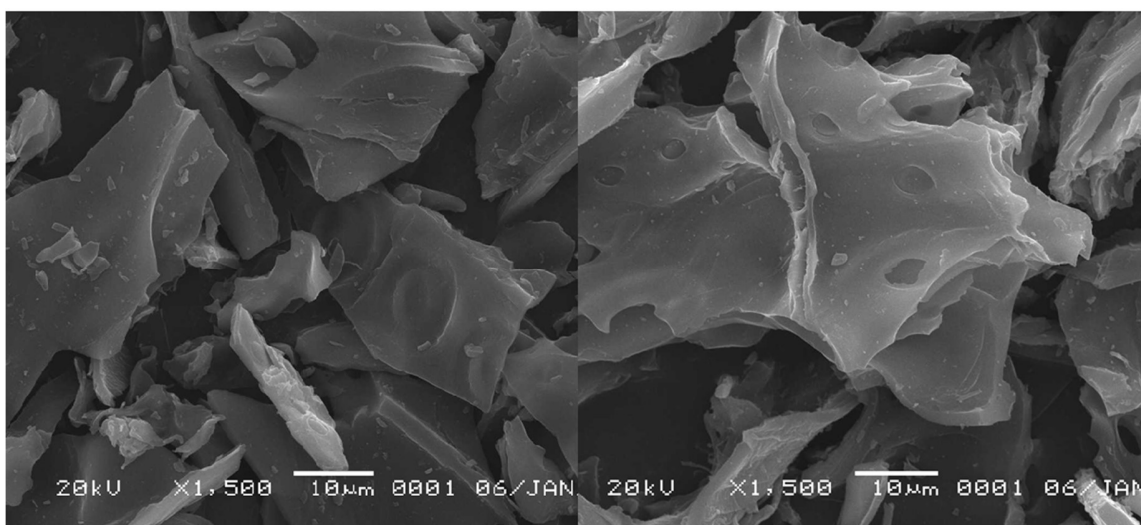

**Fig. S12.** SEM images of WB sample before use (left) and recycled after reaction (right).

## References

- [1] D. Feng, J. Lü, S. Guo and J. Li, Biochar enhanced the degradation of organic pollutants through a Fenton process using trace aqueous iron, *J. Environ. Chem. Eng.*, 2021, 9, 104677, <https://doi.org/10.1016/j.jece.2020.104677>.
- [2] X. Zhu, J. Li, B. Xie, D. Feng and Y. Li, Accelerating effects of biochar for pyrite-catalyzed Fenton-like oxidation of herbicide 2,4-D, *Chem. Eng. J.*, 2020, 391, 123605, <https://doi.org/10.1016/j.cej.2019.123605>.
